# Supplementary material for: In situ one step growth of amorphous tin oxide electron transport layer for high-performance perovskite solar cells
Source: Royal Society of Chemistry journal article supplement (doi:10.1039/d4ra01724b), 2024-01-01
Supplement: d4ra01724b1.pdf [file d4ra01724b1.pdf]

**Electronic Supplementary Information for:**

**In-situ one step growth of amorphous Tin oxide electron  
transport layers for High-Performance perovskite solar cells**

Wenlin Du<sup>1</sup>, Zhe Wan<sup>1</sup>, Jingyi Zhu<sup>1</sup>, Xin Liu<sup>1</sup>, Li Chen<sup>1</sup>, Shuxia Li<sup>1</sup>, Ning Kang<sup>1\*</sup>, Chenglong Wang<sup>1\*</sup>

1. National Engineering Research Center for Technology and Equipment of Green Coating,  
College of Lanzhou Jiaotong University, Lanzhou 730070, P.R. China

Corresponding authors

Email: N. K. Email: [826634307@qq.com](mailto:826634307@qq.com); C. L.W. Email: [clwang@lzjtu.edu.cn](mailto:clwang@lzjtu.edu.cn)

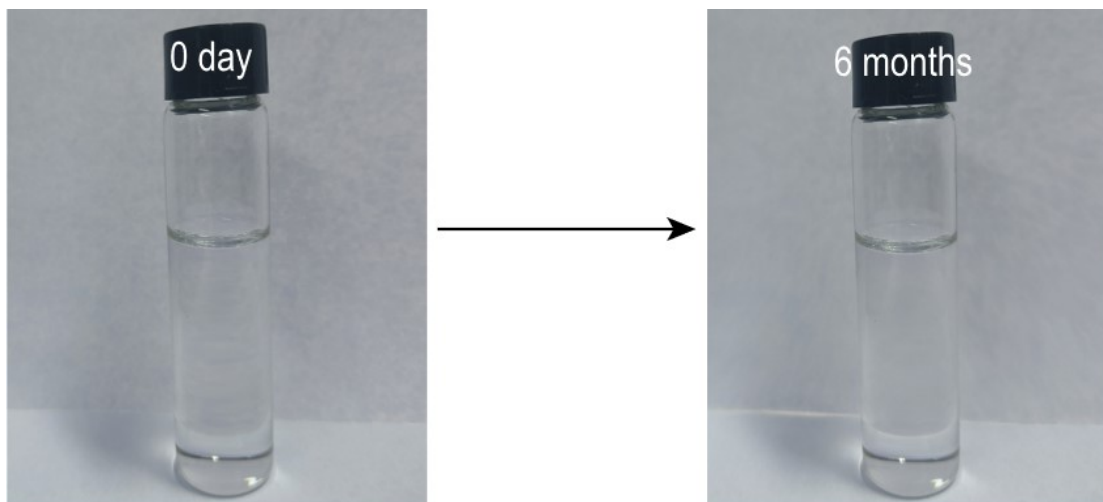

Figure S1. Digital photos of  $\text{SnCl}_2/\text{DMF}$  precursor solution before and after six months of storage at room temperature.

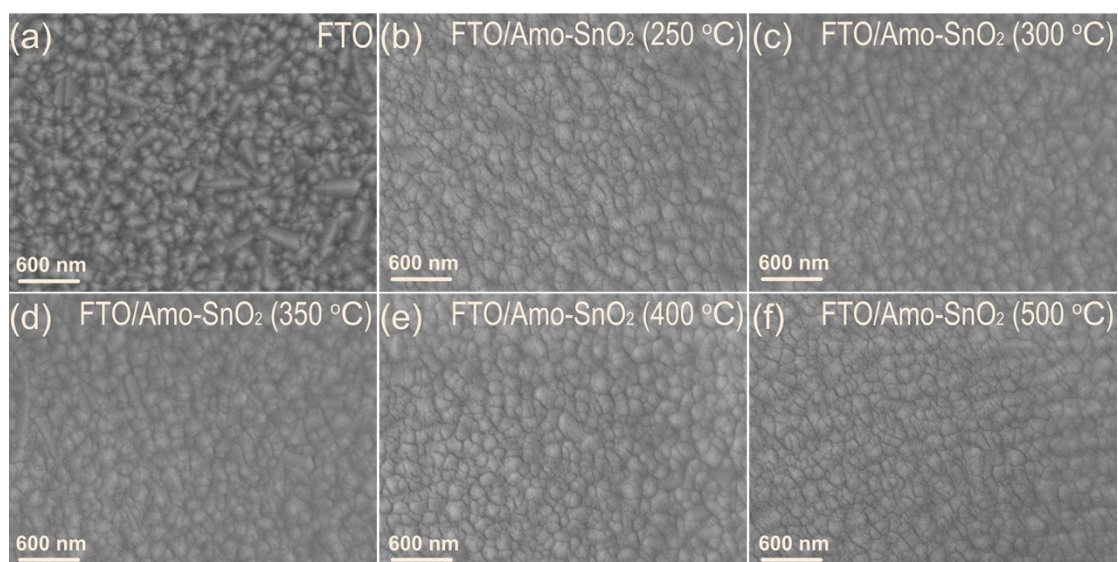

Figure S2. SEM images of  $\text{Amo-SnO}_2$  films covered onto FTO substrate with post annealing at different temperatures: (a) FTO, (b) 250 °C, (c) 300 °C, (d) 350 °C, (e) 400 °C and (f) 500 °C.

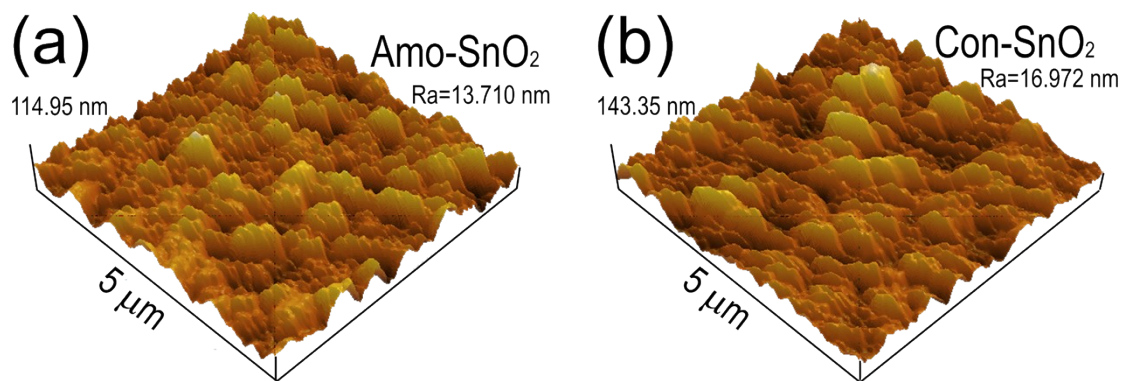

Figure S3. AFM images of Amo-SnO<sub>2</sub> and Con-SnO<sub>2</sub> films with scanning range of 5×5 μm.

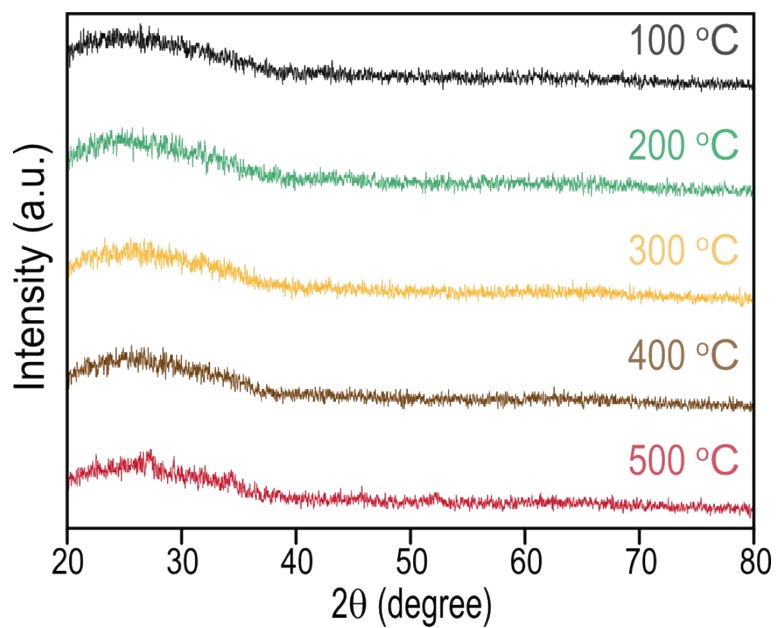

Figure S4. XRD patterns of Amo-SnO<sub>2</sub> films covered onto glass substrate with different annealing temperatures.

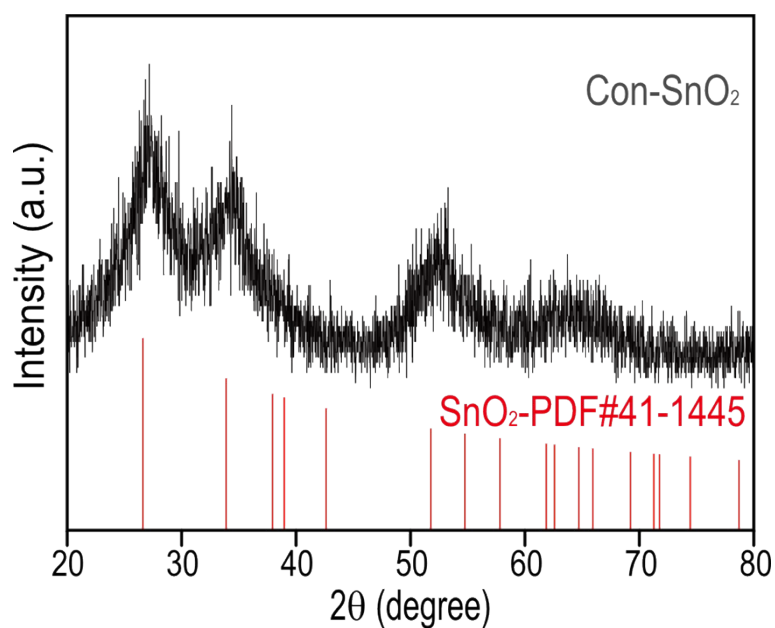

Figure S5. XRD pattern of Con-SnO<sub>2</sub> films covered onto glass substrate.

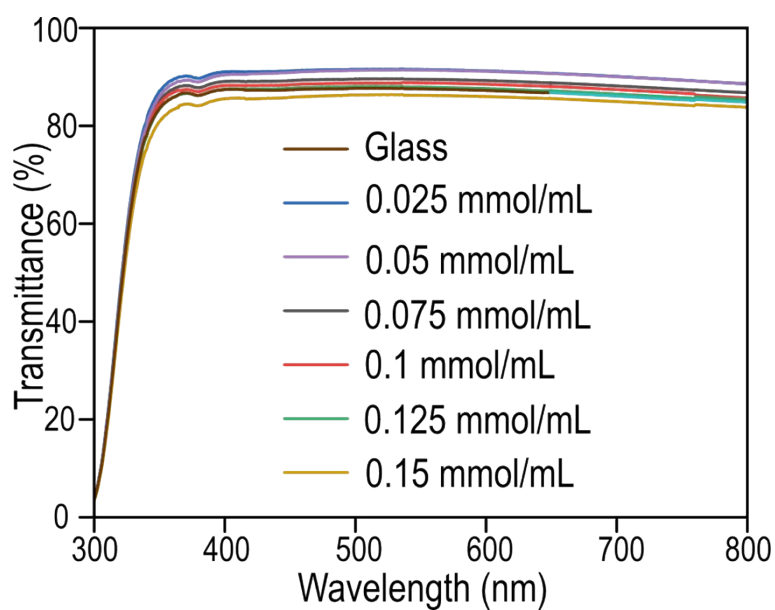

Figure S6. Optical transmittance of SnO<sub>2</sub> films covered onto glass substrate prepared with different concentrations of SnCl<sub>2</sub>/DMF solution.

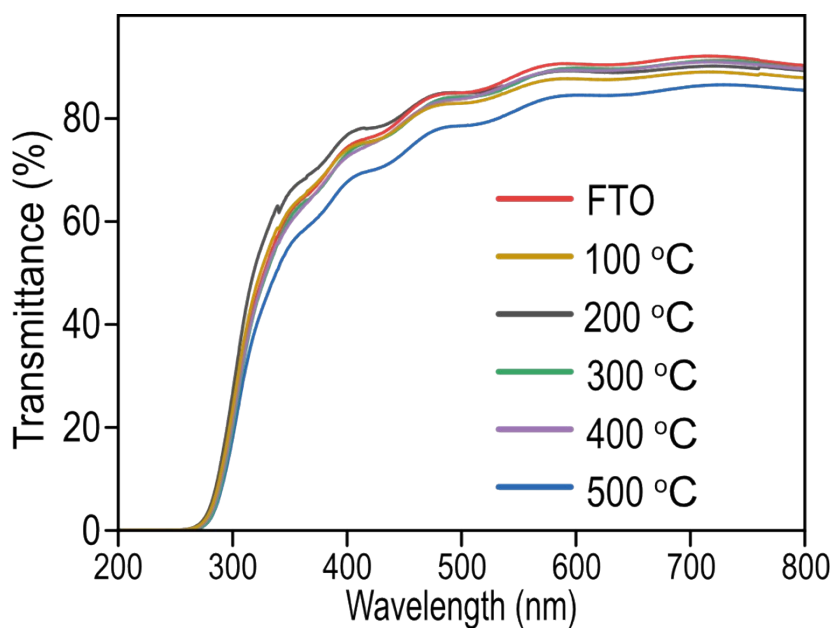

Figure S7. Optical transmittance of AmO-SnO<sub>2</sub> films annealed at different temperatures.

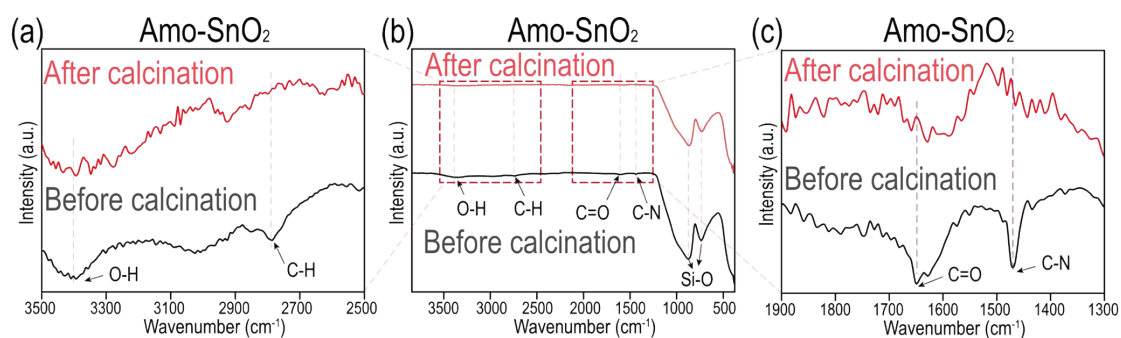

Figure S8. FTIR spectra of AmO-SnO<sub>2</sub> film before and after calcination. (a) Magnified pattern (wavenumber: 2500-3500 cm<sup>-1</sup>), (b) Full spectra (wavenumber: 400-4000 cm<sup>-1</sup>) and (c) Amplified pattern (wavenumber: 1300-1900 cm<sup>-1</sup>).

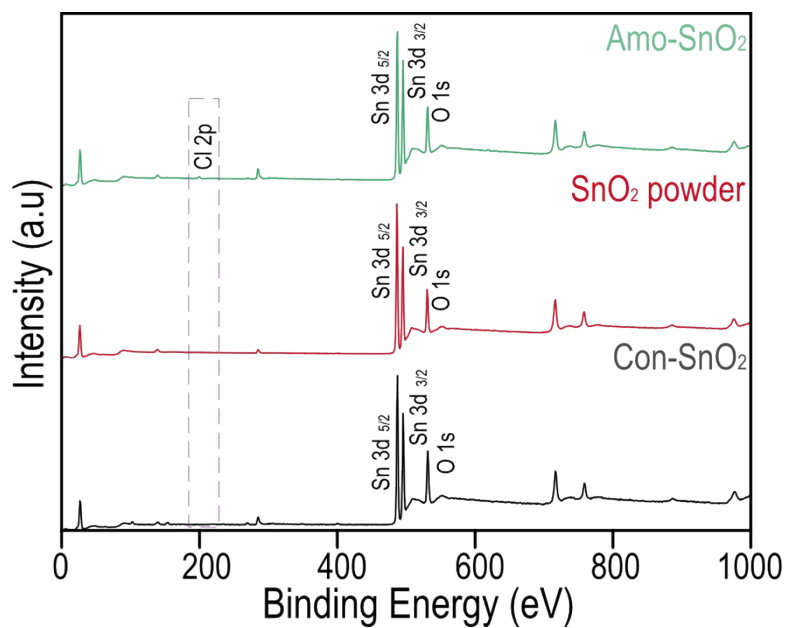

Figure S9. XPS full spectra of Amo-SnO<sub>2</sub> film, SnO<sub>2</sub> powder and Con-SnO<sub>2</sub> film.

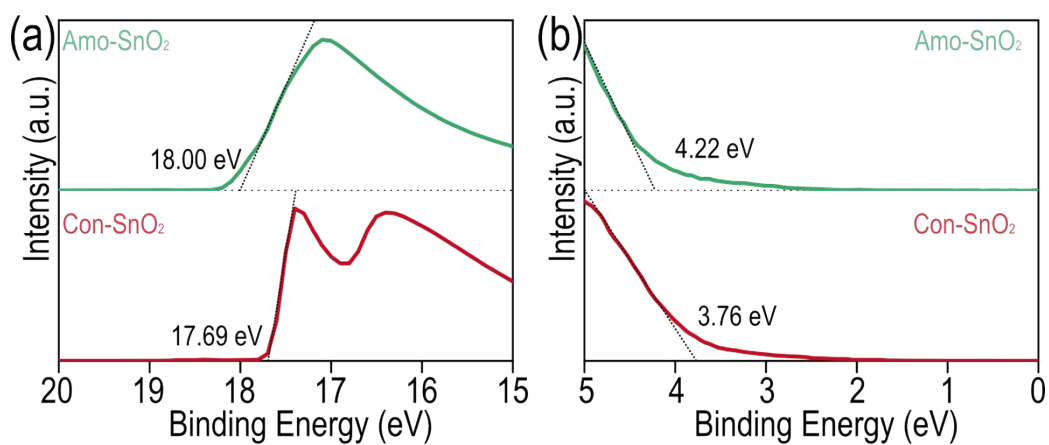

Figure S10. UPS spectra of Amo-SnO<sub>2</sub> film and Con-SnO<sub>2</sub> film. (a)  $E_{\text{cutoff}}$  edge. (b)  $E_{\text{onset}}$  range.

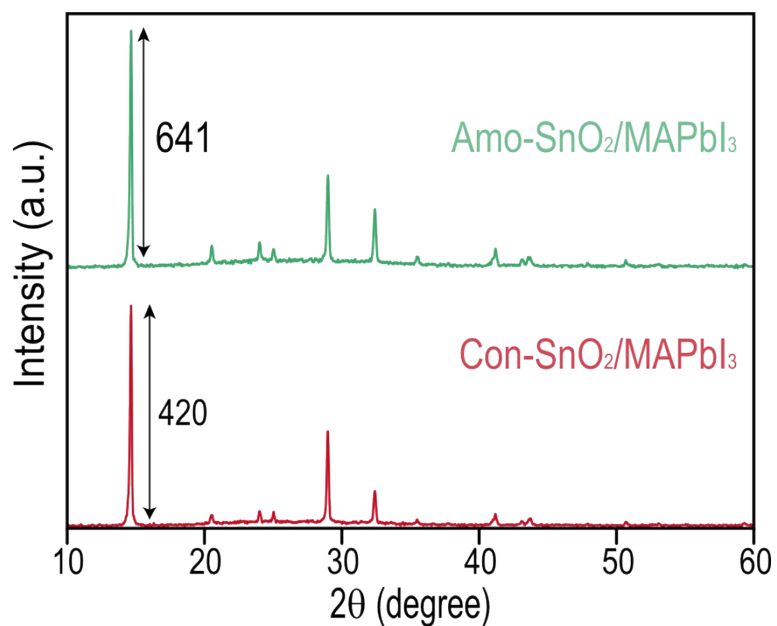

Figure S11. XRD patterns of MAPbI<sub>3</sub> thin films separately coated onto Amo-SnO<sub>2</sub> and Con-SnO<sub>2</sub> ETL annealed at 200 °C, respectively.

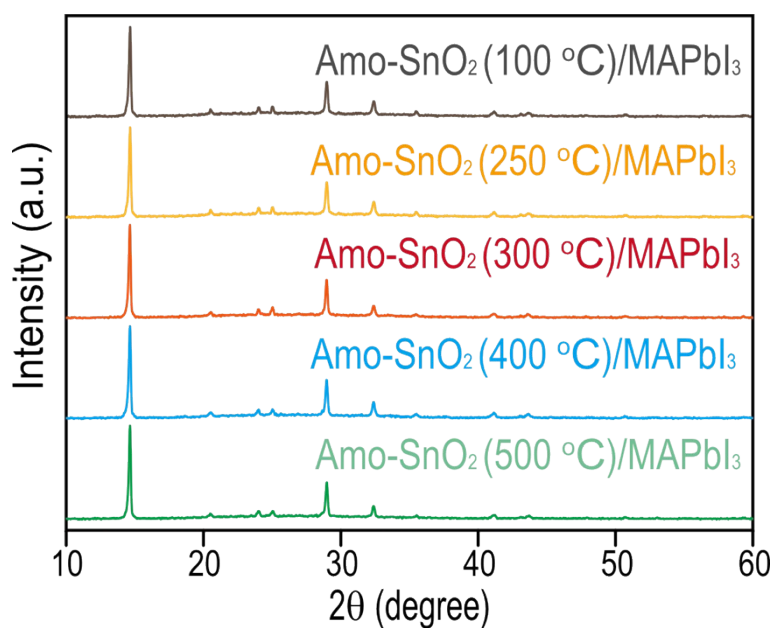

Figure S12. XRD patterns of MAPbI<sub>3</sub> films separately coated onto Amo-SnO<sub>2</sub> ETL annealed at different temperatures.

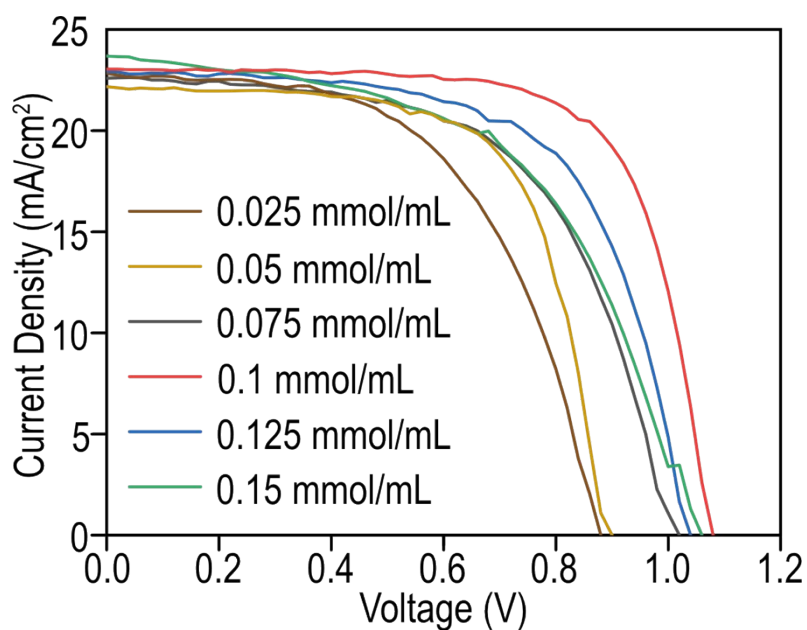

Figure S13. Reverse scan of  $J-V$  curves of PSCs in which  $\text{Amo-SnO}_2$  films are prepared using different concentrations of  $\text{SnCl}_2/\text{DMF}$  solution.

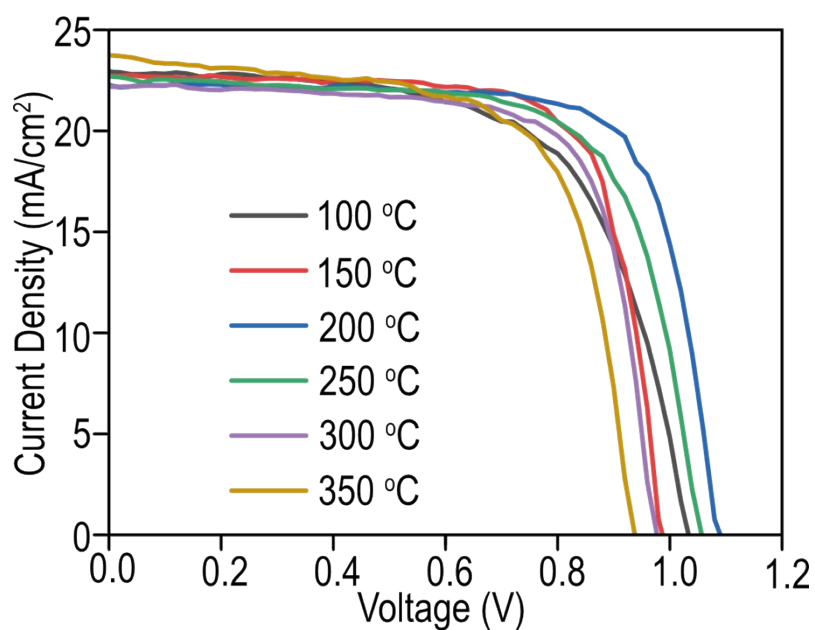

Figure S14. Reverse scan of  $J-V$  curves of PSCs in which  $\text{Amo-SnO}_2$  films are prepared by different annealing temperatures.



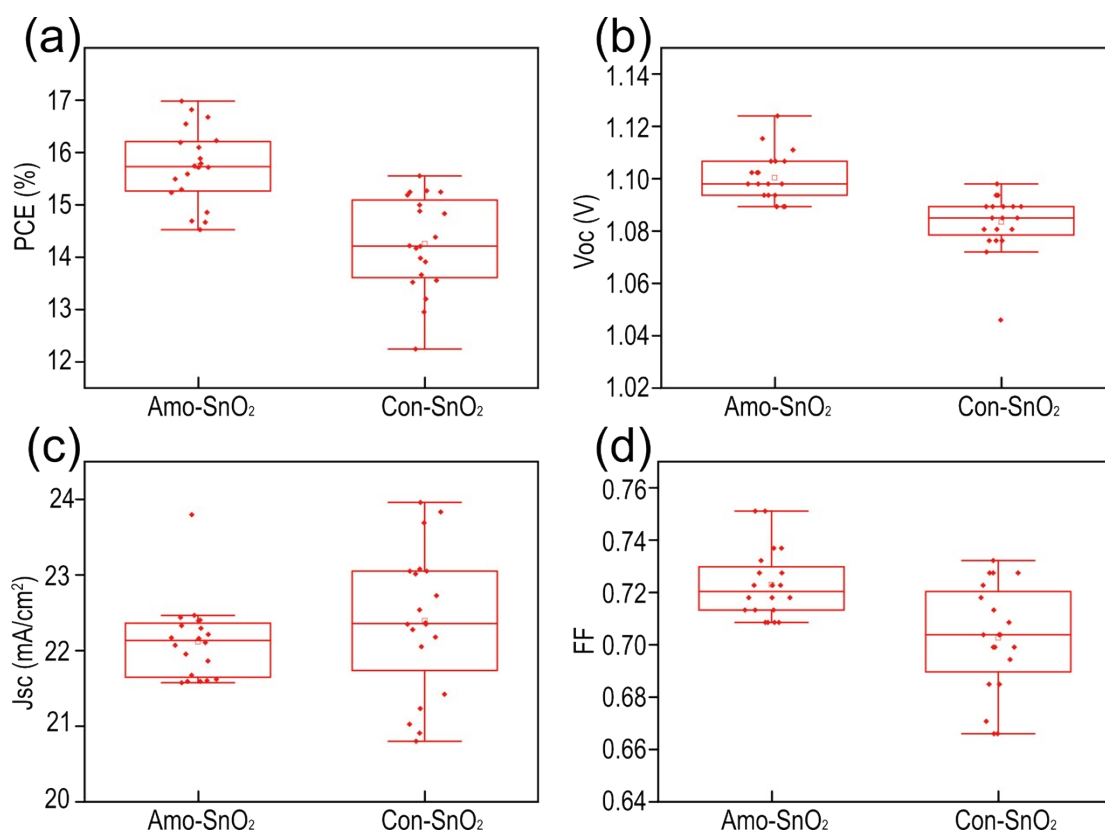

Figure S15. Statistical comparison of J-V parameters with reverse scan of PSCs between Amo-SnO<sub>2</sub> and Con-SnO<sub>2</sub> as ETL for 20 samples.

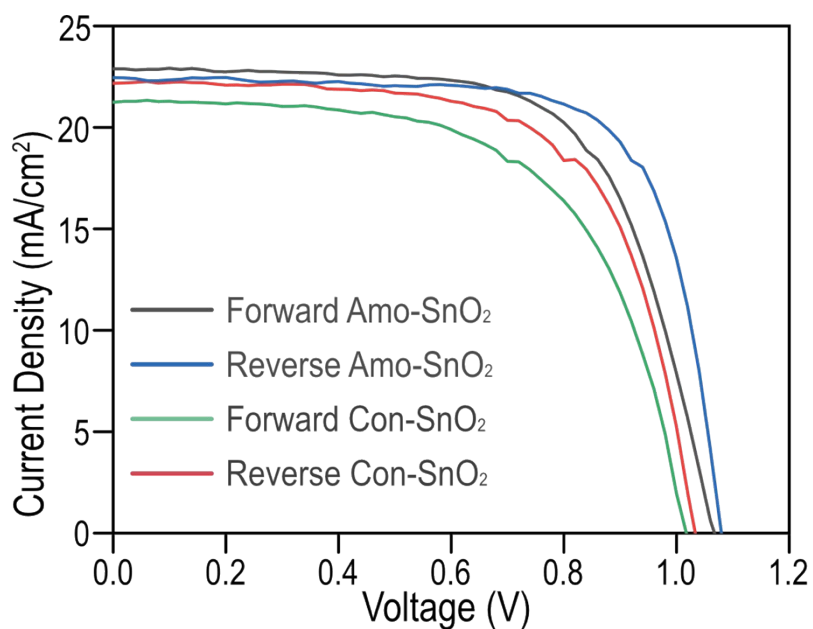

Figure S16. Forward and reverse scan of J-V curves of PSCs using Amo-SnO<sub>2</sub> or Con-SnO<sub>2</sub> as ETL.

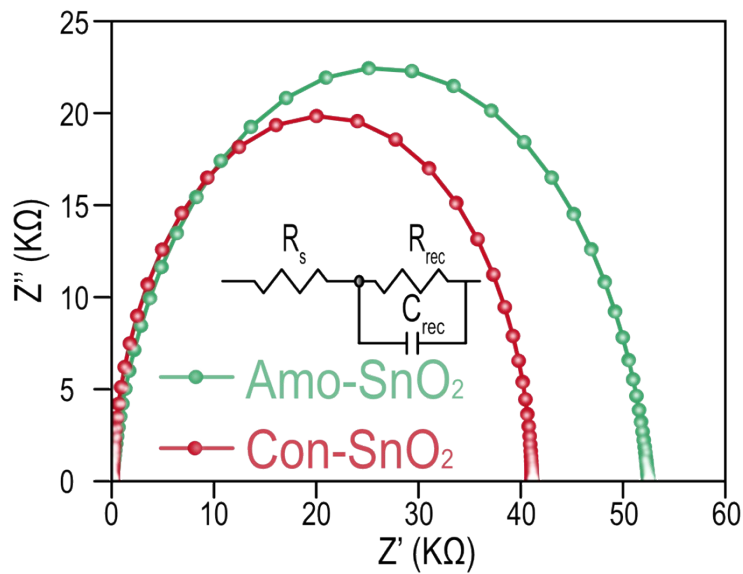

Figure S17. EIS results of SnO<sub>2</sub> films under light conditions: with a light source of atmospheric mass (AM) 1.5 G with 100 mW/cm<sup>2</sup> of incident light power density.

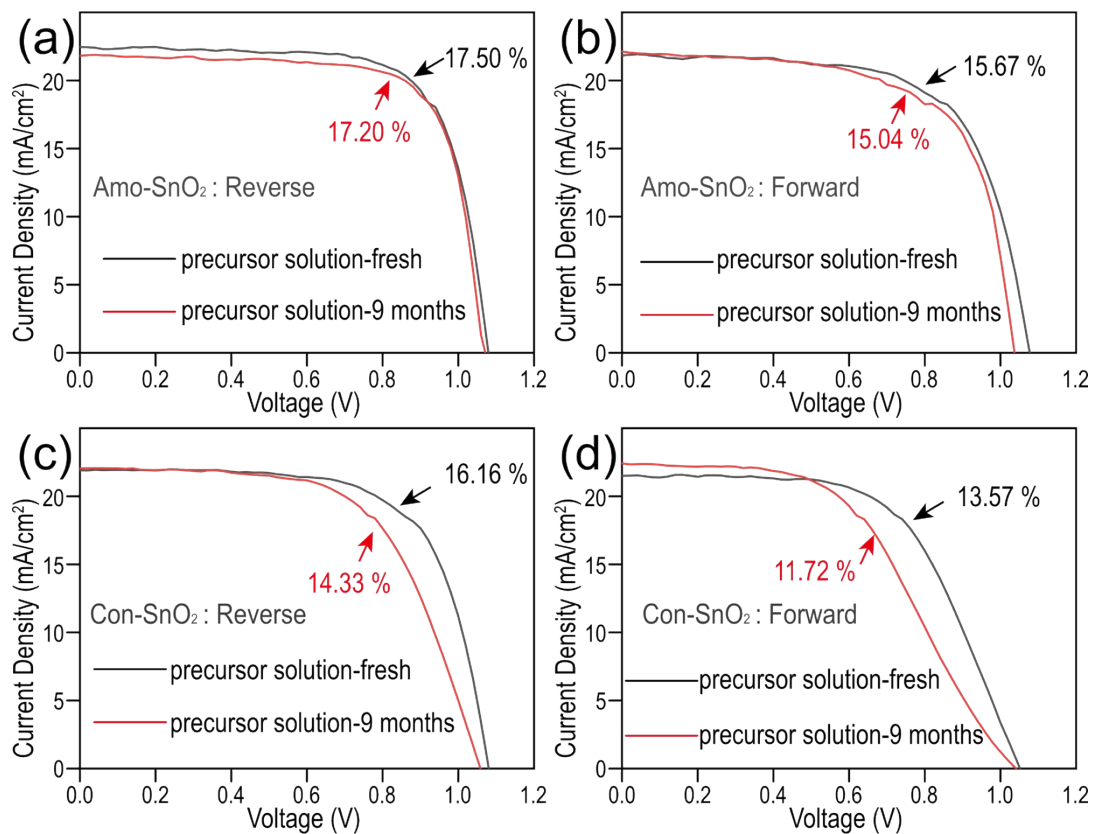

Figure S18. Forward and reverse scan of J-V curves of PSCs using Amo-SnO<sub>2</sub> or Con-SnO<sub>2</sub> as ETL, in which their precursor solutions were stored for 9 months.

**Table S1. Device parameters of PSCs in which Amo-SnO<sub>2</sub> films are prepared by different concentrations of SnCl<sub>2</sub>/DMF solution.**

| <b>Concentration of SnCl<sub>2</sub> (mmol/mL)</b> | <b>V<sub>oc</sub> (V)</b> | <b>J<sub>sc</sub> (mA/cm<sup>2</sup>)</b> | <b>FF</b> | <b>PCE (%)</b> |
|----------------------------------------------------|---------------------------|-------------------------------------------|-----------|----------------|
| 0.025                                              | 1.008                     | 20.33                                     | 0.59      | 12.11          |
| 0.050                                              | 1.034                     | 20.60                                     | 0.60      | 12.76          |
| 0.075                                              | 1.034                     | 20.64                                     | 0.64      | 13.60          |
| 0.100                                              | 1.102                     | 21.57                                     | 0.73      | 17.38          |
| 0.125                                              | 1.073                     | 20.74                                     | 0.71      | 15.83          |
| 0.150                                              | 1.045                     | 19.93                                     | 0.71      | 14.68          |

**Table S2. Device parameters of PSCs in which Amo-SnO<sub>2</sub> films are prepared by different annealing temperatures.**

| <b>T/°C</b> | <b>V<sub>oc</sub> (V)</b> | <b>J<sub>sc</sub> (mA/cm<sup>2</sup>)</b> | <b>FF</b> | <b>PCE (%)</b> |
|-------------|---------------------------|-------------------------------------------|-----------|----------------|
| 100         | 1.045                     | 19.51                                     | 0.67      | 13.61          |
| 150         | 1.054                     | 20.22                                     | 0.75      | 15.89          |
| 200         | 1.090                     | 21.25                                     | 0.76      | 17.64          |
| 250         | 1.049                     | 20.43                                     | 0.70      | 14.90          |
| 300         | 0.968                     | 19.97                                     | 0.74      | 14.23          |
| 350         | 0.930                     | 21.37                                     | 0.67      | 13.35          |

**Table S3.** Performance comparison of PSCs obtained from this work and the reported works.

| <b>Device structure</b>                                            | <b><math>V_{oc}</math> (V)</b> | <b><math>J_{sc}</math> (mA/cm<sup>2</sup>)</b> | <b>FF</b> | <b>PCE (%)</b> | <b>Reference</b> |
|--------------------------------------------------------------------|--------------------------------|------------------------------------------------|-----------|----------------|------------------|
| FTO/Amo-SnO <sub>2</sub> /MAPbI <sub>3</sub> /<br>Spiro-OMeTAD /Ag | 1.090                          | 21.25                                          | 0.76      | 17.64          | <b>This work</b> |
| FTO/Con-SnO <sub>2</sub> /MAPbI <sub>3</sub> /<br>Spiro-OMeTAD /Ag | 1.05                           | 24.26                                          | 0.64      | 16.43          | <b>This work</b> |
| FTO/SnO <sub>2</sub> /MAPbI <sub>3</sub> / Spiro-<br>OMeTAD /Au    | 1.090                          | 18.48                                          | 0.75      | 15.10          | 1                |
|                                                                    | 1.11                           | 23.23                                          | 0.67      | 17.21          | 2                |
| ITO/SnO <sub>2</sub> /MAPbI <sub>3</sub> / Spiro-<br>OMeTAD /Ag    | 1.06                           | 19.72                                          | 0.74      | 15.61          | 3                |

## Notes and references

- 1 W. J. Ke, D. W. Zhao, A. J. Cimaroli, C. R. Grice, P. L. Qin, Q. Liu, L. B. Xiong, Y. F. Yan and G. J. Fang, *J. Mater. Chem. A.*, 2015 **3** 24163-24168.
- 2 W. J. Ke, G. J. Fang, Q. Liu, L. B. Xiong, P. L. Qin, H. Tao, J. Wang, H. W. Lei, B. R. Li, J. W. Wan, G. Yang and Y. F. Yan, *J. Am. Chem. Soc.*, 2015 **137** 6730-6733.
- 3 H. X. Xie, W. X. Que, *Front. Chem.*, 2024 **12** 1361275.
